# Supplementary material
Source: PubMed Central journal article supplement (PMC7480382)
Supplement: AEM.00915-20-s0001.pdf [file AEM.00915-20-s0001.pdf]

## Supplemental Information for

**Species-specific quorum sensing represses the chitobiose utilization locus  
in *Vibrio cholerae***

Catherine A. Klancher, Jane D. Newman, Alyssa S. Ball, Julia C. van Kessel, and  
Ankur B. Dalia\*

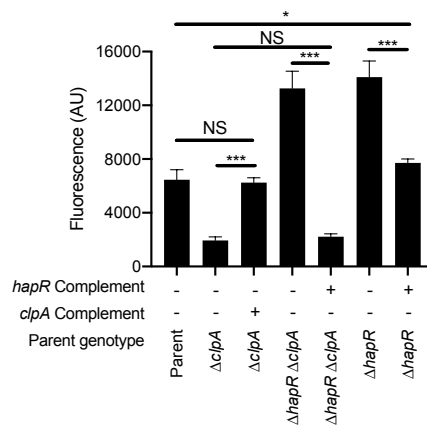

**Figure S1.** *Complementation of  $\Delta hapR$  and  $\Delta clpA$  mutant strains.* Expression of a  $P_{chb}$ -GFP transcriptional reporter was determined in the indicated strains. The parent strain contained a chromosomally-encoded  $P_{chb}$ -GFP reporter and a  $\Delta cbp$  mutation. Strains were complemented with a chromosomally-encoded single copy of the indicated gene driven by its native promoter at an ectopic site (*hapR* or *clpA* Complement). Fluorescence of cultures was determined on a plate reader from at least three independent biological replicates and is shown as the mean  $\pm$  SD. Statistical comparisons were made by one-way ANOVA with Tukey's post-test. NS, not significant. \*,  $p = 0.0104$ . \*\*\*,  $p < 0.001$ . The  $P_{chb}$ -GFP fluorescence data for " $\Delta clpA$ ", " $\Delta hapR \Delta clpA$ ", and " $\Delta hapR$ " are identical to the data presented in **Fig. 1** and were included here for ease of comparison.

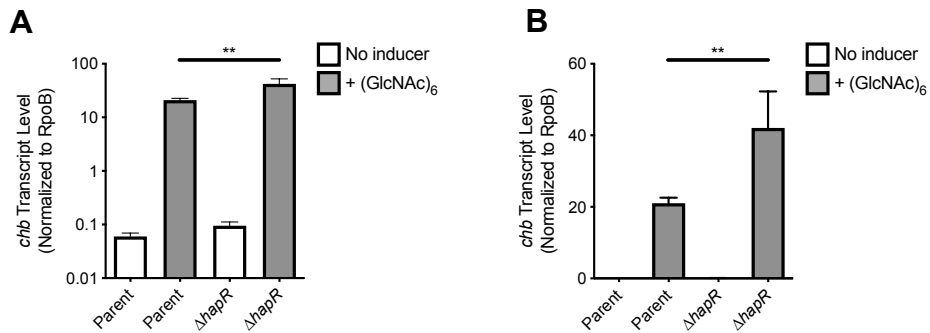

**Figure S2.** *HapR* is a repressor of native *chb* expression. The indicated strains were induced with sterile water (no inducer) or chitin oligosaccharides (+ (GlcNAc)<sub>6</sub>), then assessed for *chb* transcript abundance by qRT PCR. The parent strain used was *V. cholerae* E7946 WT. Data are shown on **A**) a log scale or **B**) a linear scale. The latter plot helps accentuate that deletion of *hapR* results in a two-fold increase in native *chb* transcripts in response to chitin oligosaccharides, which is similar to what is observed using transcriptional reporters. Data are from at least three independent biological replicates and is shown as the mean  $\pm$  SD. Statistical comparisons were made by one-way ANOVA with Tukey's post-test. \*\*,  $p = 0.0064$ .

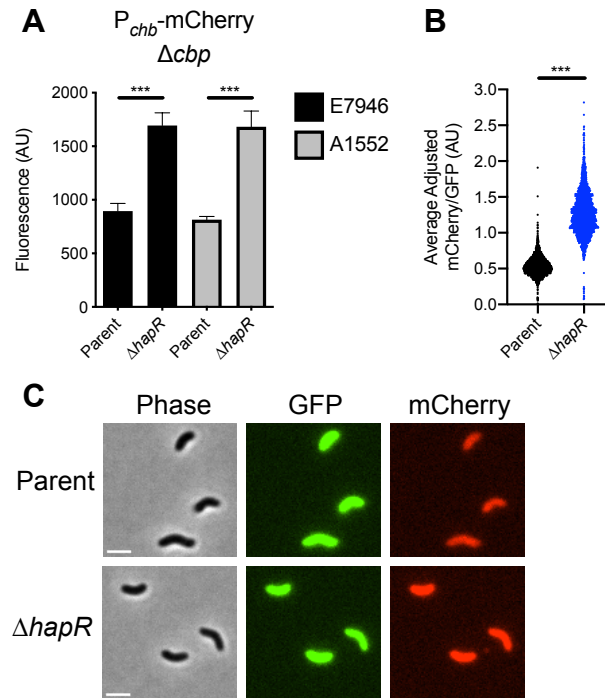

**Figure S3.** *HapR* is a repressor of  $P_{chb}$  in *V. cholerae* E7946 and *V. cholerae* A1552. **A)** Expression of a  $P_{chb}$ -mCherry reporter was determined in the indicated mutant strains. Each respective parent strain contained a  $P_{chb}$ -mCherry reporter and a  $\Delta cbp$  mutation to activate ChiS. **B)** Scatter plot showing the relative expression of a  $P_{chb}$ -mCherry reporter in the indicated *V. cholerae* A1552 strains that have *cbp* intact when using chitin oligosaccharides to induce cells. The parent strain background contains both a  $P_{chb}$ -mCherry reporter, a  $P_{const2}$ -GFP construct (which exhibits constitutive GFP expression), and *cbp* intact.  $n = 2189$  for Parent;  $n = 2164$  for  $\Delta hapR$ . Data shown are from two independent biological replicates. **C)** Representative images of *V. cholerae* A1552 strains analyzed in **B**. Scale bar = 2  $\mu m$ . Statistical comparisons in **A** were made using a one way ANOVA with Tukey's post test and in **B** were made using Student's t-test. \*\*\*,  $p < 0.001$ .

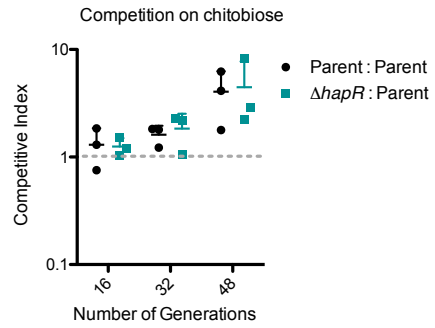

**Figure S4.** A  $\Delta hapR$  mutant does not have a fitness advantage for growth on chitobiose. The indicated *V. cholerae* strains were mixed and co-cultured in M9 minimal media supplemented with 0.2% chitobiose + 10  $\mu$ M CAI-1 and grown for the indicated number of generations. Each data point represents an independent biological replicate.

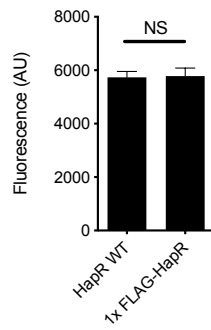

**Figure S5.** *N-terminally FLAG-tagged HapR is functional for regulation of  $P_{chb}$ .* Strains expressing the indicated HapR allele at the native locus were assessed for expression of a  $P_{chb}$ -GFP reporter. Both strains also harbored a  $\Delta cbp$  deletion to activate ChiS. Statistical comparisons were made using Student's t-test. NS, not significant.

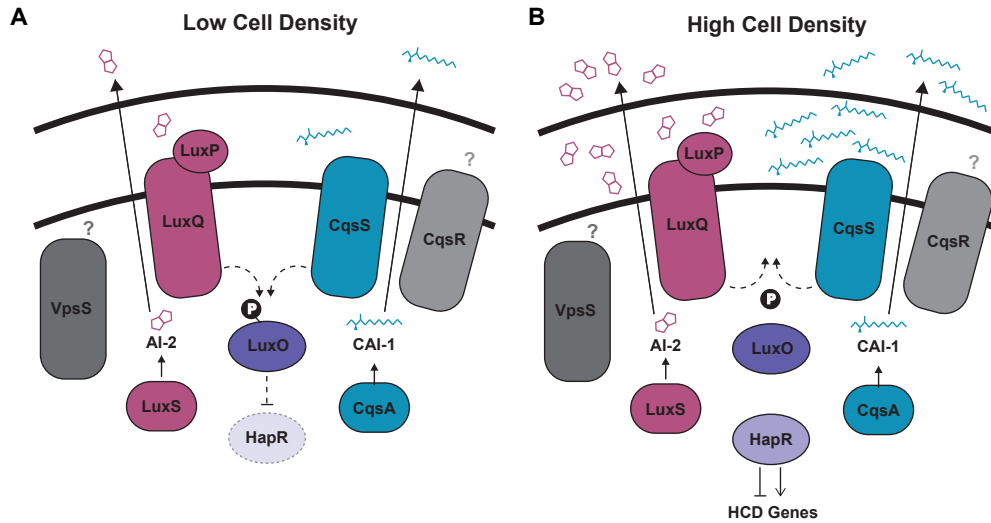

**Figure S6.** Model of quorum sensing regulation in *V. cholerae*. There are four parallel sensor kinases that contribute to QS in *V. cholerae*: LuxQ, CqsS, VpsS, and CqsR. The signals for VpsS and CqsR are unknown. LuxPQ senses the interspecies autoinducer AI-2 and CqsS senses the *V. cholerae*-specific autoinducer CAI-1. AI-2 is produced by the LuxS synthase and CAI-1 is produced by the CqsA synthase. **(A)** At low cell density, the LuxQ and CqsS sensors act as kinases, resulting in phosphorylation of LuxO, which subsequently decreases expression of HapR. **(B)** At high cell density, LuxQ and CqsS act as phosphatases, which results in dephosphorylation of LuxO, and subsequent activation of HapR expression. Dashed lines indicate indirect effects of one protein on another.

**Table S1.** Other hits from  $P_{chb}$  activator screen and  $\Delta clpA$  counter-screen.

| <b>Activator or <math>\Delta clpA</math> counter-screen?</b> | <b>Gene</b> | <b>VC gene designation</b> | <b>Putative function</b>                 | <b>Number of unique insertions</b> |
|--------------------------------------------------------------|-------------|----------------------------|------------------------------------------|------------------------------------|
| Activator                                                    | <i>treC</i> | VC0911                     | Trehalose-6-phosphate hydrolase          | 5                                  |
| Activator                                                    | <i>cyaA</i> | VC0122                     | Adenylate cyclase                        | 1                                  |
| $\Delta clpA$ counter-screen                                 | <i>nagC</i> | VC0993                     | GlcNAc transcriptional repressor protein | 4                                  |
| $\Delta clpA$ counter-screen                                 | <i>cytR</i> | VC2677                     | Cytidine repressor protein               | 1                                  |
